# Supplementary material
Source: MDPI journal article supplement (https://www.mdpi.com/2073-4395/13/1/206)
Supplement: s1 [file s1]

## Supplementary Materials

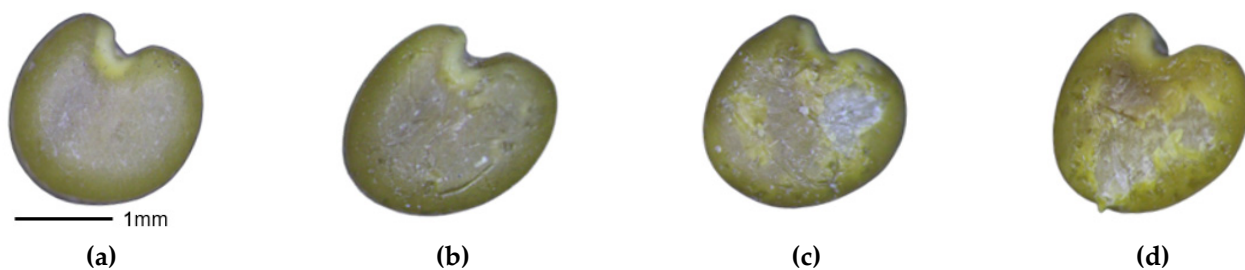

**Figure S1.** Light micrograph of sandpaper (SP) treated seeds. (a) Untreated, (b) SP1, (c) SP3, (d) SP5.

**Table S1.** Seed moisture content (SMC) of sandpaper (SP) treated seeds after 6, 12, 18 and 24 h of imbibition in water.

| Seed Treatment | Seed moisture content (%) |      |      |      |      |      |      |      |      |      |      |      |
|----------------|---------------------------|------|------|------|------|------|------|------|------|------|------|------|
|                | 6 h                       |      |      | 12 h |      |      | 18 h |      |      | 24 h |      |      |
|                | R1                        | R2   | R3   | R1   | R2   | R3   | R1   | R2   | R3   | R1   | R2   | R3   |
| Untreated      | 10.1                      | 9.4  | 7.6  | 7.3  | 12.4 | 8.6  | 11.6 | 16.7 | 7.0  | 9.4  | 11.2 | 12.8 |
| SP1            | 65.8                      | 61.7 | 59.2 | 66.8 | 64.0 | 61.5 | 73.6 | 65.1 | 66.4 | 67.9 | 65.1 | 66.4 |
| SP3            | 69.6                      | 68.8 | 70.2 | 67.4 | 68.8 | 71.2 | 66.8 | 71.2 | 72.6 | 67.1 | 74.0 | 70.3 |
| SP5            | 73.7                      | 73.9 | 67.9 | 75.8 | 70.9 | 71.1 | 70.6 | 74.7 | 73.7 | 74.0 | 79.1 | 71.8 |

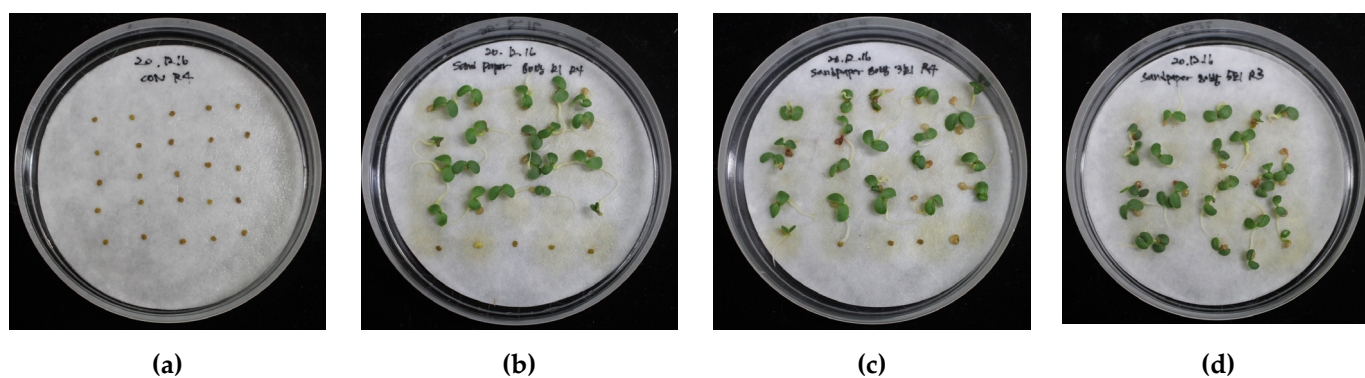

**Figure S2.** Photos of germination of sandpaper (SP) treated seeds. (a) Untreated, (b) SP1, (c) SP3, (d) SP5. Seed germination at 14 days after sowing.

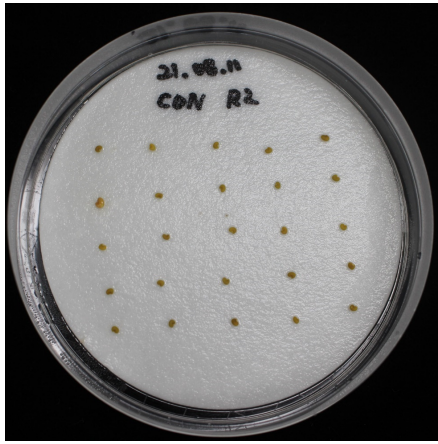

(a)

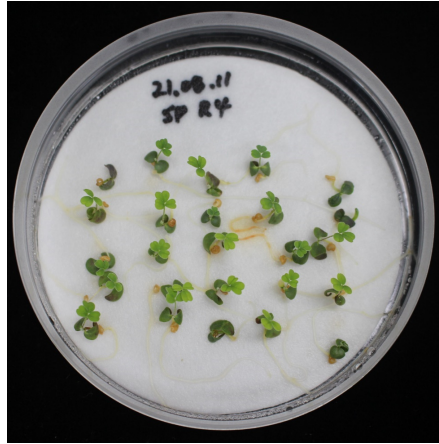

(b)

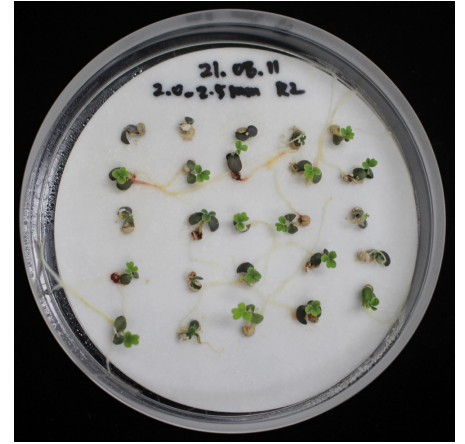

(c)

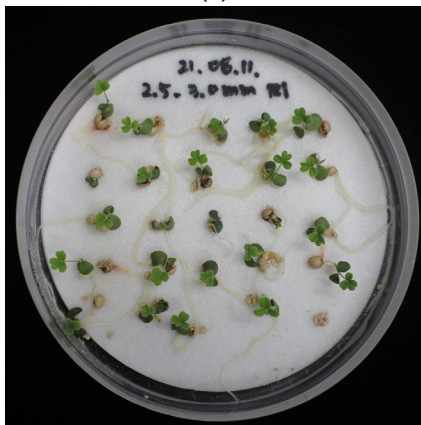

(d)

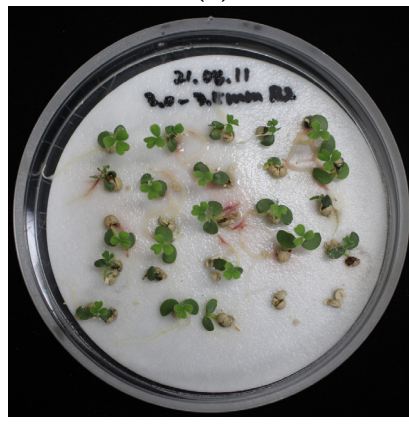

(e)

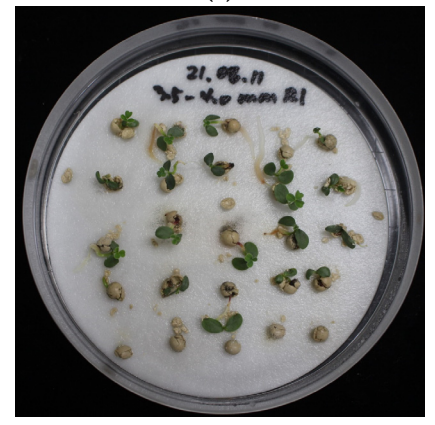

(f)

**Figure S3.** Photos of germination of pelleted seeds on filter papers. (a) Unpelleted CON, (b) Unpelleted SP, (c) 2.0-2.5 mm, (d) 2.5-3.0 mm, (e) 3.0-3.5 mm (f) 3.5 -4.0 mm. Seed germination at 14 days after sowing.

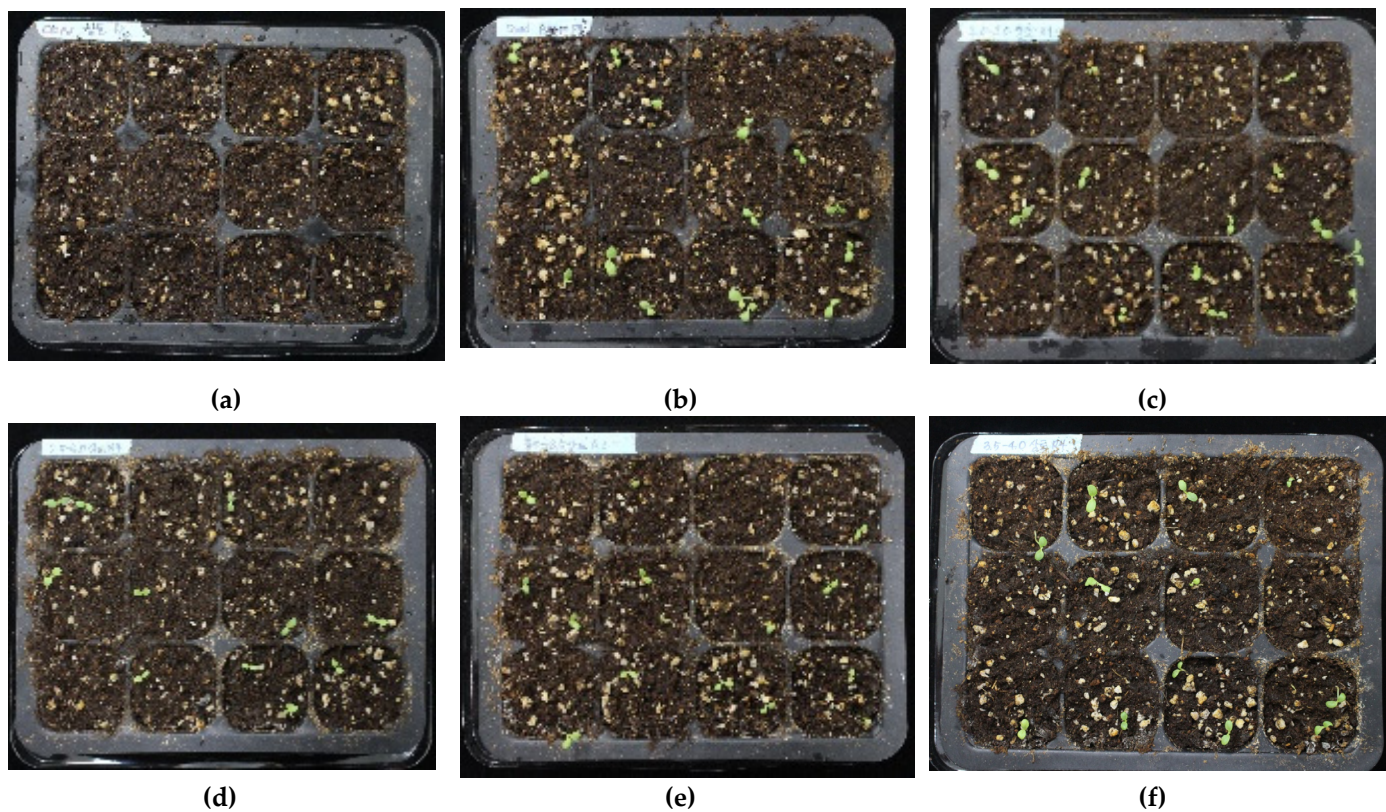

**Figure S4.** Photos of germination of pelleted seeds in commercial soil. (a) Unpelleted CON, (b) Unpelleted SP, (c) 2.0-2.5 mm, (d) 2.5-3.0 mm, (e) 3.0-3.5 mm (f) 3.5 -4.0 mm. Seed germination at 14 days after sowing.

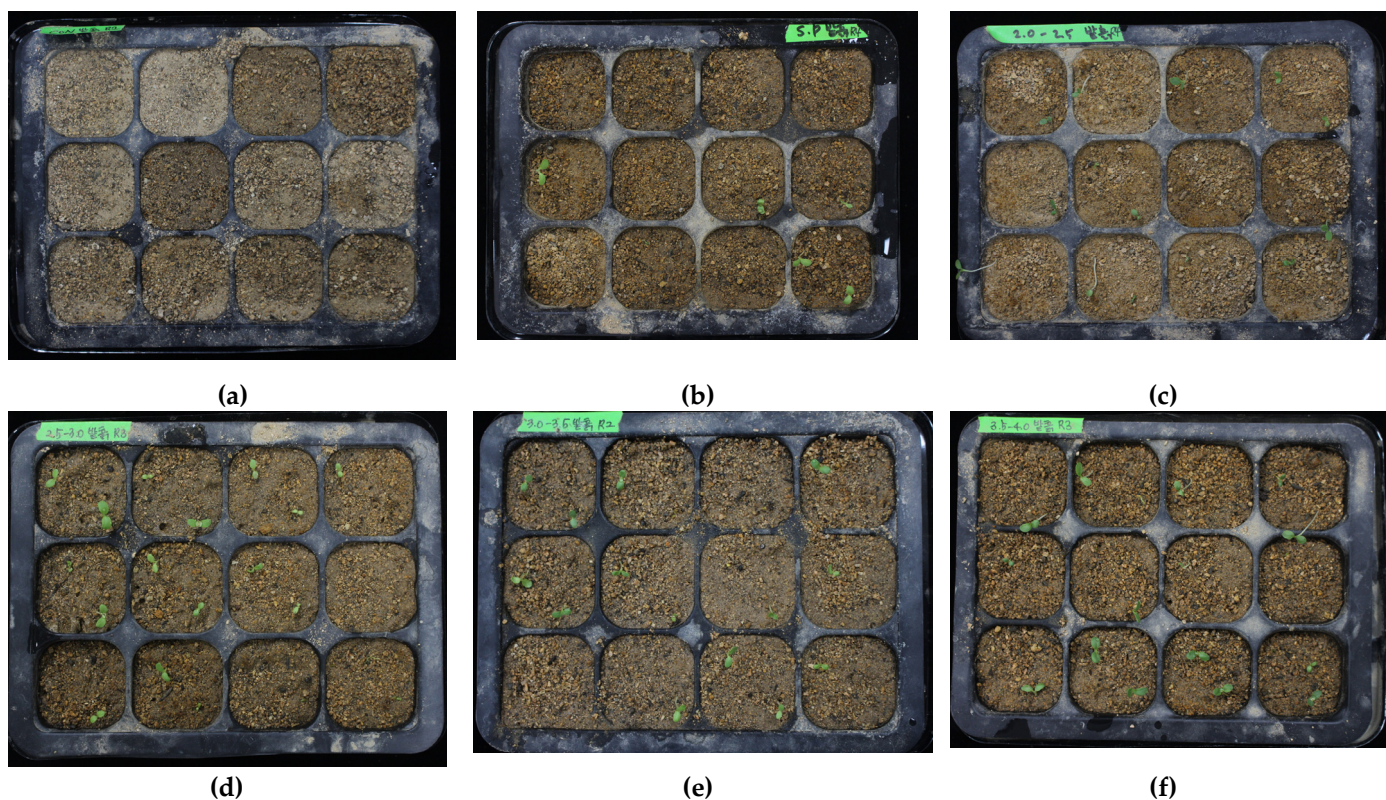

**Figure S5.** Photos of germination of pelleted seeds in field soil. (a) Unpelleted CON, (b) Unpelleted SP, (c) 2.0-2.5 mm, (d) 2.5-3.0 mm, (e) 3.0-3.5 mm (f) 3.5 -4.0 mm. Seed germination at 14 days after sowing.

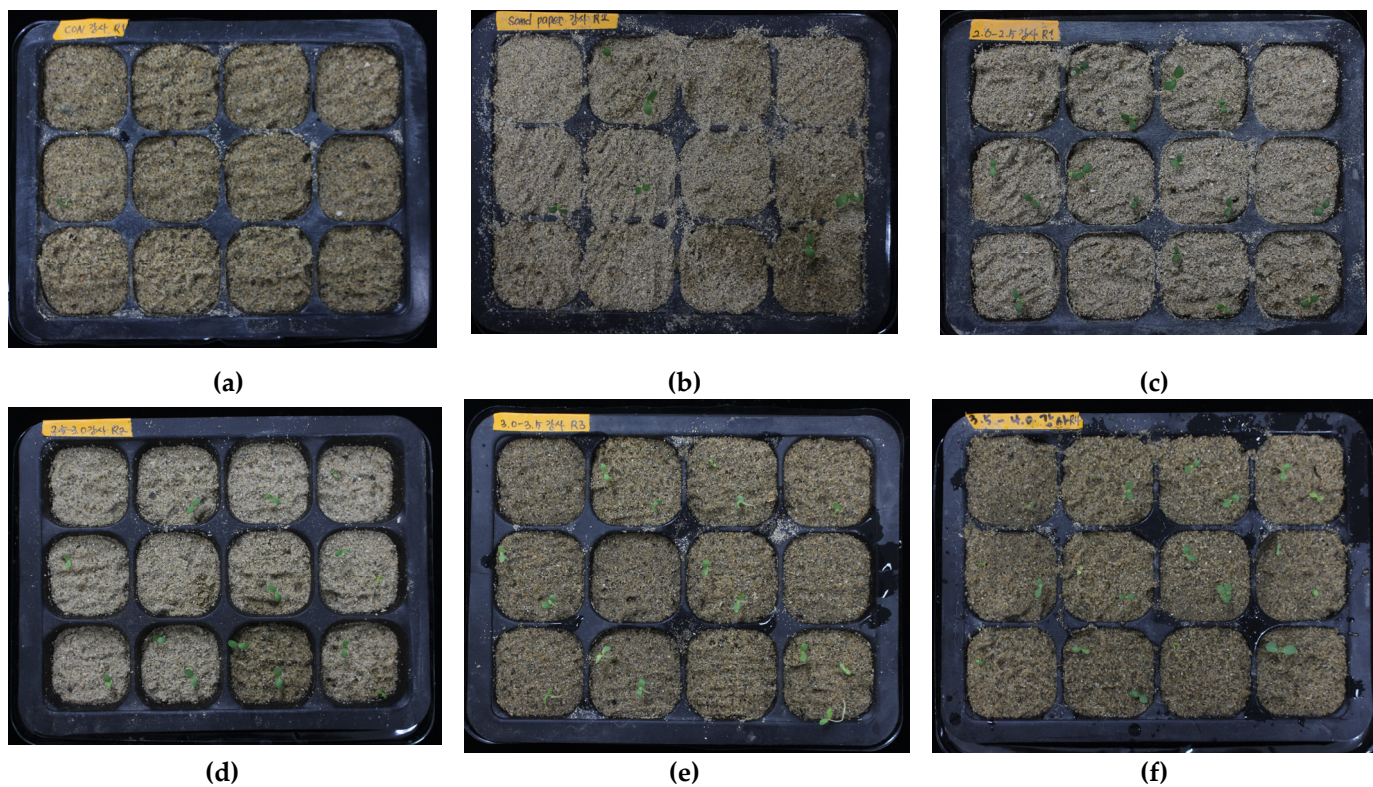

**Figure S6.** Photos of germination of pelleted seeds in sand. (a) Unpelleted CON, (b) Unpelleted SP, (c) 2.0-2.5 mm, (d) 2.5-3.0 mm, (e) 3.0-3.5 mm (f) 3.5 -4.0 mm. Seed germination at 14 days after sowing.
